# Supplementary material
Source: PubMed Central journal article supplement (PMC4641829)
Supplement: NIHMS698787-supplement-01.pdf [file NIHMS698787-supplement-01.pdf]

## Online Repository Figures

Figure E1. ROC curves for SPT, soy extract and component sIgE levels

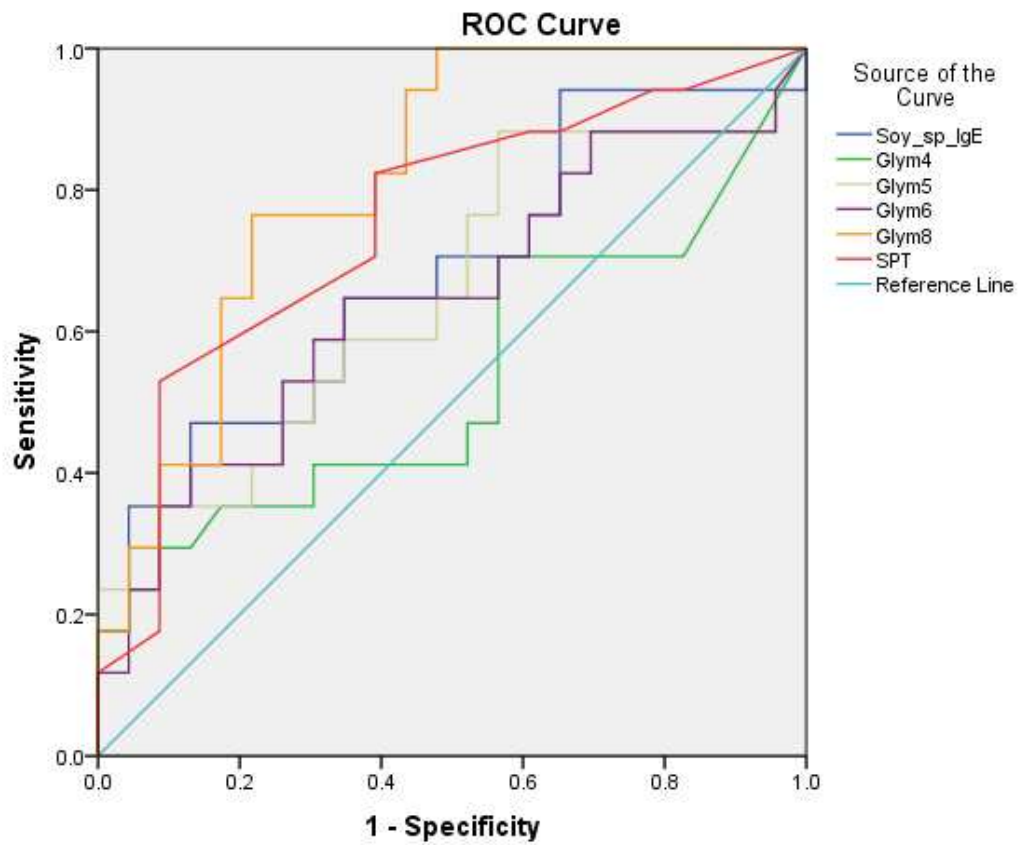

Diagonal segments are produced by ties.

ACCEPTED
